# Supplementary material
Source: HighWire-hosted journal article supplement (https://cebp.aacrjournals.org/content/suppl/2013/09/25/1055-9965.EPI-13-0305)

Supplementary Fig. 5

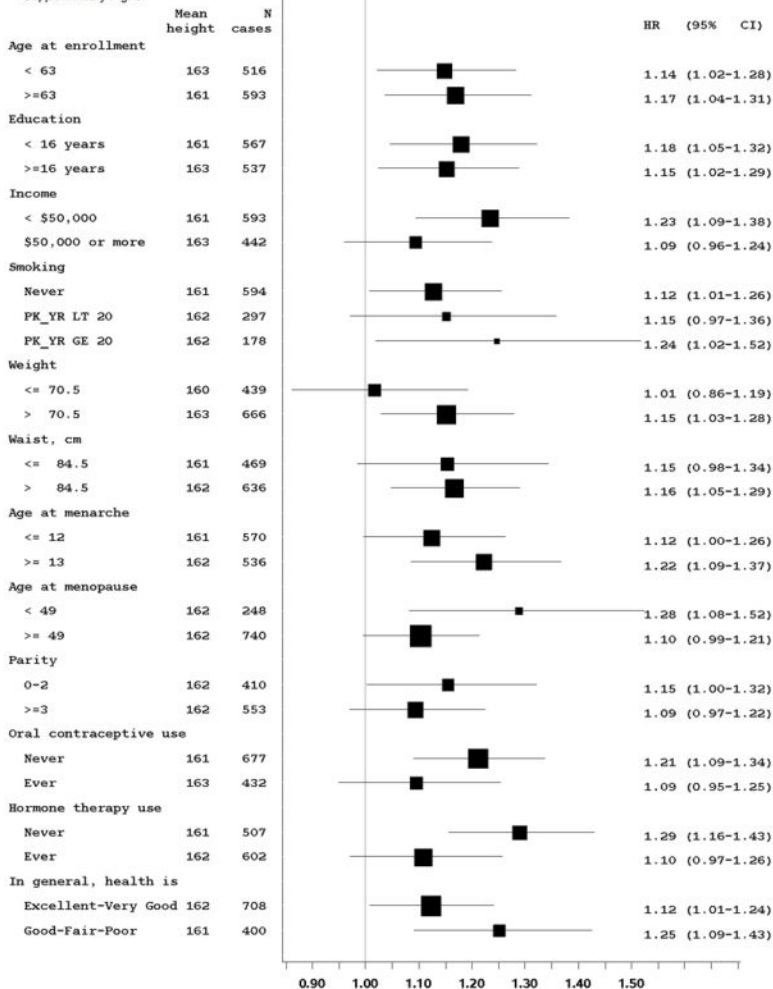

Supplement: fig_5.pdf [file fig_5.pdf]
